# Supplementary material for: H. pylori virulence factor CagA increases intestinal cell proliferation by Wnt pathway activation in a transgenic zebrafish model
Source: PubMed Central journal article supplement — Dis Model Mech. 2013 Mar 1;6(3):802–10. doi: 10.1242/dmm.011163 (PMC3634662; doi:10.1242/dmm.011163), 2013-03-01
Supplement: supp_011163_DMM011163.pdf [file supp_011163_DMM011163.pdf]

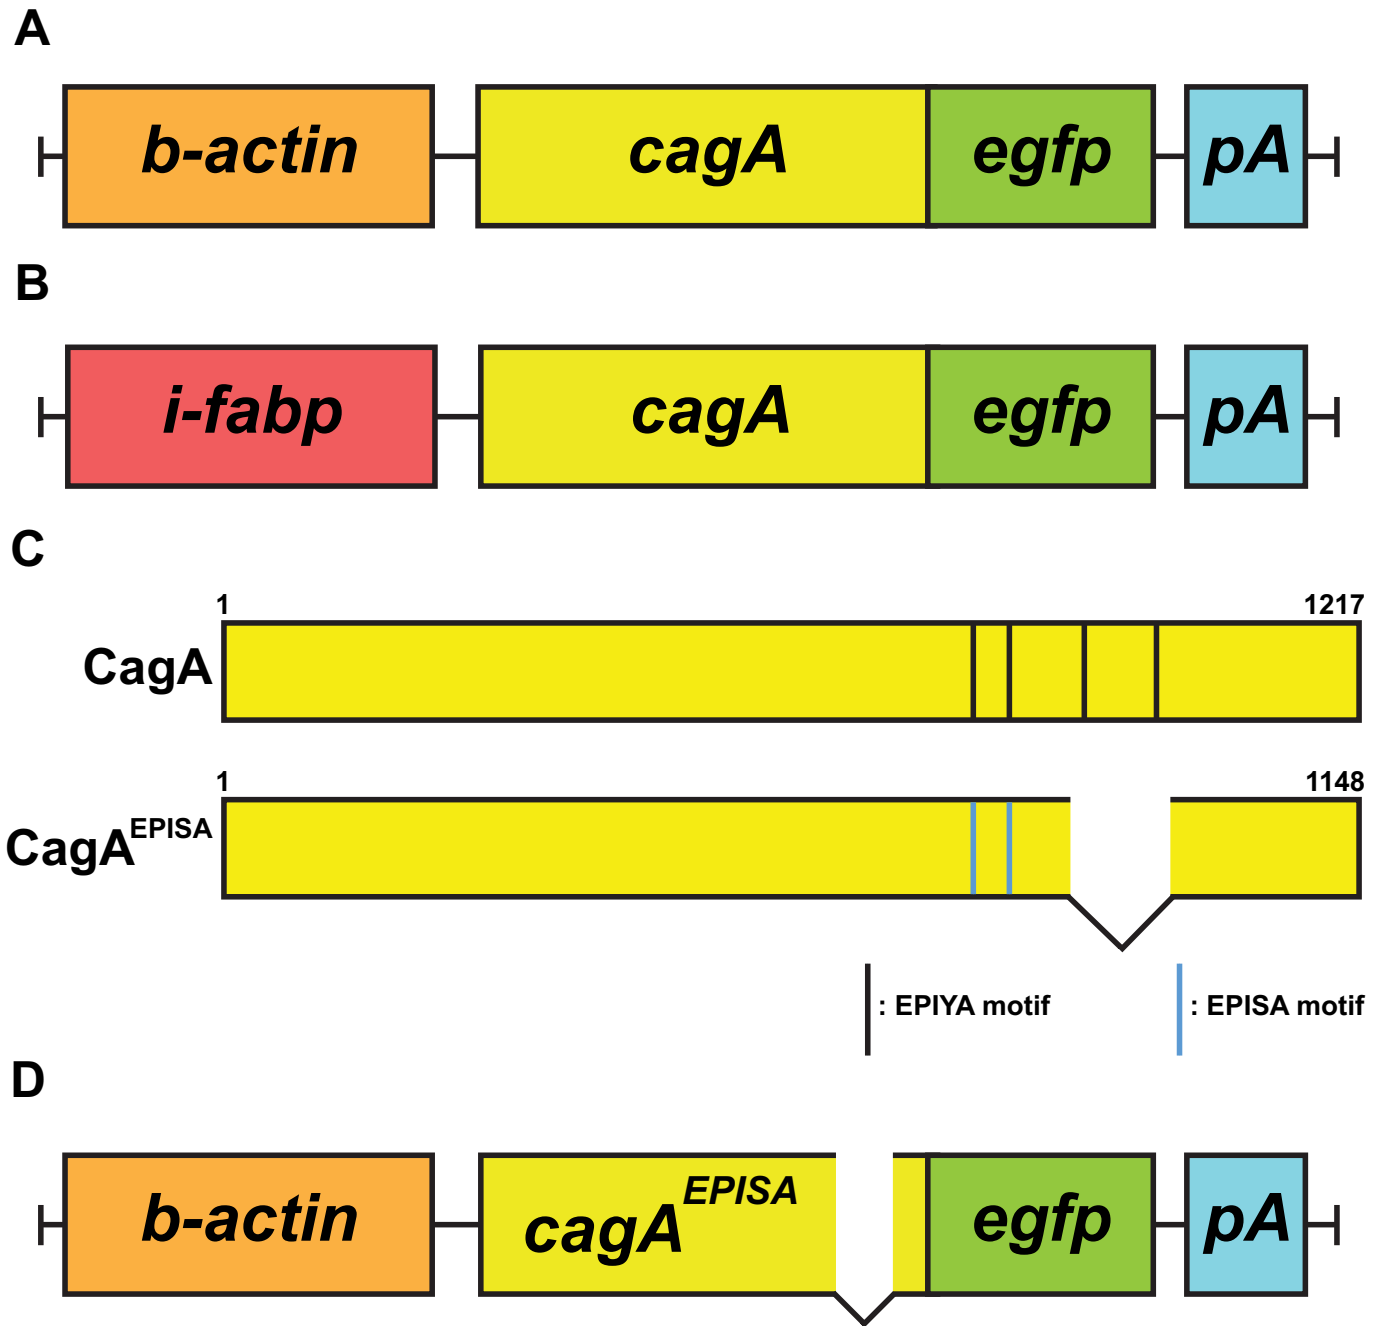

**Fig. S1. Transgenic constructs.** (A) The *cagA:egfp* fusion cassette was cloned downstream of the 5.3kb *b-actin* promoter fragment. (B) The *cagA:egfp* fusion cassette was cloned downstream of the 1.6kb *i-fabp* promoter fragment. (C) The phosphorylation resistant *cagA<sup>EPISA</sup>* allele lacks EPIYA motifs for phosphorylation by Src family kinases. (D) The *cagA<sup>EPISA</sup>:egfp* fusion cassette was cloned downstream of the 5.3kb *b-actin* promoter fragment.

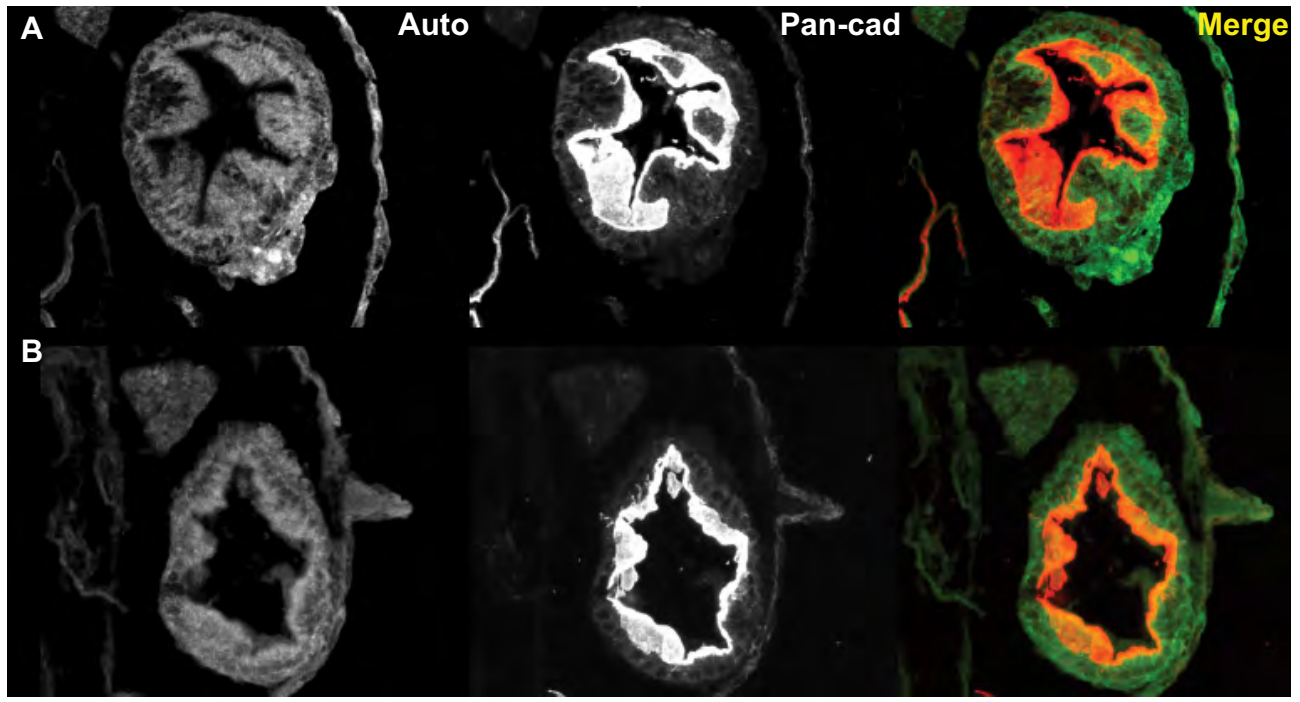

**Fig. S2. CagA expression does not disrupt early intestinal morphology or cell polarity.** Fluorescence micrograph of intestinal cross-sections of wild-type (A) and *b-cagA* (B) animals at 6 dpf showing green autofluorescence or staining with a pan-cadherin antibody.

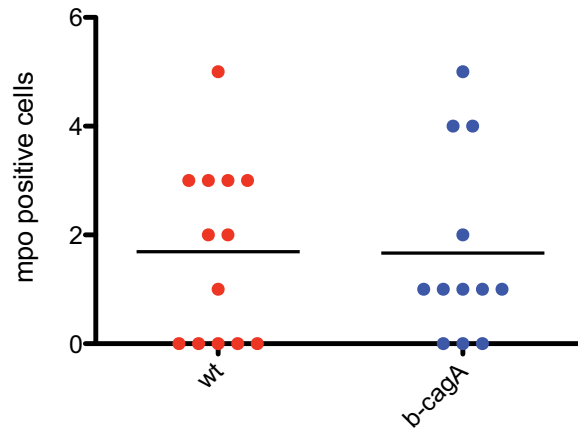

**Fig. S3. CagA expression does not result in increased inflammation.** Myeloperoxidase (mpo)-positive neutrophils present in the intestine at 8 dpf.

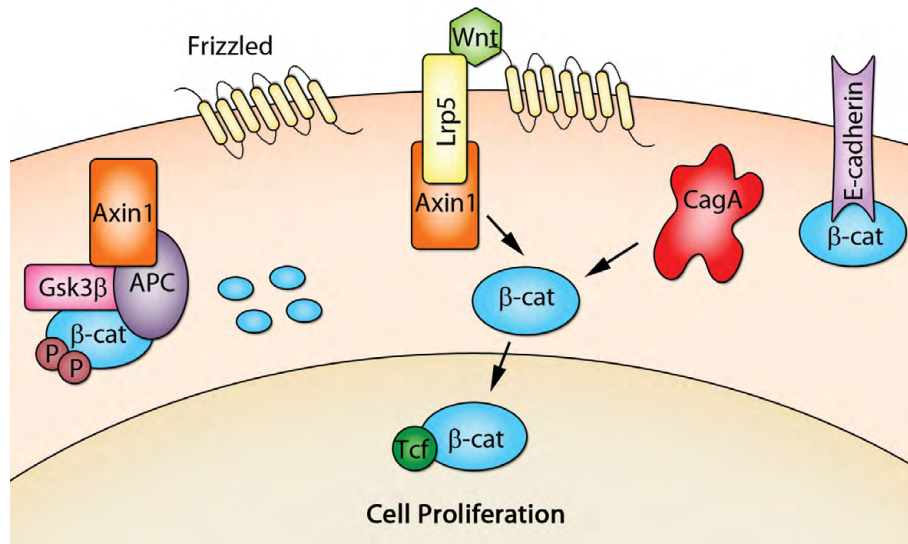

Fig. S4. Proposed mechanism for CagA-dependent overproliferation of the intestinal epithelium.

| Genotype                                            | Number of individuals | Hyperplasia/Dysplasia | Intestinal Adenocarcinoma | Other Carcinoma                             |
|-----------------------------------------------------|-----------------------|-----------------------|---------------------------|---------------------------------------------|
| WT                                                  | 22                    | 0                     | 0                         | 0                                           |
| <i>b-cagA</i>                                       | 24                    | 8 (33%)               | 0                         | 0                                           |
| <i>i-cagA</i>                                       | 19                    | 8 (42%)               | 0                         | 0                                           |
| <i>b-cagA<sup>EPISA</sup></i>                       | 18                    | 0                     | 0                         | 0                                           |
| <i>tp53<sup>M214K/M214K</sup></i>                   | 5                     | 2 (40%)               | 1 (20%)                   | 1 (oropharyngeal carcinoma <i>in situ</i> ) |
| <i>i-cagA;</i><br><i>tp53<sup>M214K/M214K</sup></i> | 7                     | 1 (14%)               | 3 (43%)                   | 2 (29%) (intestinal small cell carcinoma)   |

**Table S1. Histological abnormalities by genotype.** Type and frequency of unique histological abnormalities observed in adult zebrafish. One fish from genotype *tp53<sup>M214K/M214K</sup>* had both intestinal adenocarcinoma and oropharyngeal carcinoma *in situ*.

| Gene                                  | Forward (5'-3')                     | Reverse (5'-3')                     |
|---------------------------------------|-------------------------------------|-------------------------------------|
| <i>Succinate dehydrogenase (SDHA)</i> | GeNorm zebrafish reference gene kit | GeNorm zebrafish reference gene kit |
| <i>β-actin</i>                        | GeNorm zebrafish reference gene kit | GeNorm zebrafish reference gene kit |
| <i>cagA</i>                           | tggagggcctactggtgggga               | tcaggcggtaagcctgtatgtcgg            |
| <i>myca</i>                           | ccagcagcagtggcagcgat                | ggggactggggtacctcgactct             |
| <i>cyclinD1</i>                       | aggctttgaaacgtaagcctgcgg            | aggtacactgggcatccgtgca              |

**Table S2. Primers used for quantitative real-time PCR**
